# Supplementary material for: A Sensor-Based Screening Tool for Identifying High Pelvic Mobility in Patients Due to Undergo Total Hip Arthroplasty
Source: MDPI journal article supplement (doi:10.3390/s20216182), 2020-10-30
Supplement: s1 [file s1]

**Table S1.** Inclusion and exclusion criteria for patient recruitment onto the trial.

| Inclusion Criteria                                                                                                        | Exclusion Criteria                                                                                                                                                                                  |
|---------------------------------------------------------------------------------------------------------------------------|-----------------------------------------------------------------------------------------------------------------------------------------------------------------------------------------------------|
| All patients undergoing an elective primary unilateral THA under the care of an orthopaedic consultant at UHCW NHS Trust. | Those patients deemed by the treating clinician as unsuitable for an uncemented primary acetabular implant for reasons such as: low demand patient, osteoporosis, significant acetabular bone loss. |
| Provision of written informed consent.                                                                                    | Patients with significant orthopaedic deformities (e.g., fused knee, hip or ankle).                                                                                                                 |
| Male or Female aged 18-70 years.                                                                                          | Unable to undergo planning imaging (unable to stand or sit for radiographic imaging, or to lie in a CT scanner).                                                                                    |
|                                                                                                                           | Patients currently receiving ionising radiation treatment or scans for other medical conditions.                                                                                                    |
| Able and willing to comply with all study requirements.                                                                   | Previous entry in the trial (contralateral THA).                                                                                                                                                    |
|                                                                                                                           | Participation in a clinical trial of an investigational medicinal product in the last 90 days.                                                                                                      |

**Table S2.** Participant information.

| Participant No. | Gender | Age (years) | Body Mass Index<br>(kg m <sup>-2</sup> ) |
|-----------------|--------|-------------|------------------------------------------|
| 1               | F      | 54          | 39.7                                     |
| 2               | M      | 65          | 30.3                                     |
| 3               | F      | 55          | 29.3                                     |
| 4               | F      | 70          | 22.3                                     |
| 5               | M      | 63          | 29.3                                     |
| 6               | F      | 54          | 24.8                                     |
| 7               | M      | 58          | 35.2                                     |
| 8               | M      | 53          | 36.3                                     |
| 9               | F      | 60          | 32.7                                     |
| 10              | M      | 47          | 30.2                                     |
| 11              | M      | 23          | 24.5                                     |
| 12              | F      | 51          | 35.6                                     |
| 13              | M      | 58          | 26.0                                     |
| 14              | F      | 60          | 29.0                                     |
| 15              | F      | 55          | 26.7                                     |
| 16              | F      | 59          | 27.4                                     |
| 17              | F      | 50          | 27.2                                     |
| 18              | F      | 61          | 29.7                                     |
| 19              | M      | 51          | 33.0                                     |
| 20              | F      | 70          | 24.8                                     |
| 21              | F      | 57          | 35.6                                     |
| 22              | F      | 49          | 21.9                                     |
| 23              | M      | 45          | 27.3                                     |
| 24              | M      | 60          | 22.9                                     |
| 25              | F      | 70          | 26.3                                     |
| 26              | M      | 56          | 28.8                                     |
| 27              | M      | 69          | 27.5                                     |
| 28              | M      | 63          | 35.8                                     |
| 29              | F      | 56          | 34.9                                     |
| 30              | F      | 56          | 28.0                                     |
| 31              | M      | 70          | 27.2                                     |
| 32              | M      | 68          | 24.5                                     |

**Table S3.** Start and end pitch/roll for the experiment described in the Appendix.

| <b>Trial No.</b> | <b>Start pitch<br/>(deg)</b> | <b>Start roll (deg)</b> | <b>End pitch<br/>(deg)</b> | <b>End roll (deg)</b> |
|------------------|------------------------------|-------------------------|----------------------------|-----------------------|
| 1                | 0                            | 0                       | 5                          | 0                     |
| 2                | 0                            | 0                       | 15                         | 0                     |
| 3                | 0                            | 0                       | 30                         | 0                     |
| 4                | 0                            | 0                       | -5                         | 0                     |
| 5                | 0                            | 0                       | -15                        | 0                     |
| 6                | 0                            | 0                       | -30                        | 0                     |
| 7                | 5                            | 0                       | 10                         | 0                     |
| 8                | 5                            | 0                       | 20                         | 0                     |
| 9                | -5                           | 0                       | -10                        | 0                     |
| 10               | -5                           | 0                       | -20                        | 0                     |
| 11               | 0                            | 0                       | 5                          | 10                    |
| 12               | 0                            | 0                       | 15                         | 10                    |
| 13               | 0                            | 0                       | 30                         | 10                    |
| 14               | 0                            | 0                       | -5                         | 10                    |
| 15               | 0                            | 0                       | -15                        | 10                    |
| 16               | 0                            | 0                       | -30                        | 10                    |
| 17               | 0                            | 0                       | 5                          | -10                   |
| 18               | 0                            | 0                       | 15                         | -10                   |
| 19               | 0                            | 0                       | 30                         | -10                   |
| 20               | 0                            | 0                       | -5                         | -10                   |
| 21               | 0                            | 0                       | -15                        | -10                   |
| 22               | 0                            | 0                       | -30                        | -10                   |
| 23               | 0                            | 5                       | 5                          | 15                    |
| 24               | 0                            | 5                       | 15                         | 15                    |
| 25               | 0                            | 5                       | 30                         | 15                    |
| 26               | 0                            | 5                       | -5                         | 15                    |
| 27               | 0                            | 5                       | -15                        | 15                    |
| 28               | 0                            | 5                       | -30                        | 15                    |
| 29               | 0                            | -5                      | 5                          | -15                   |
| 30               | 0                            | -5                      | 15                         | -15                   |
| 31               | 0                            | -5                      | 30                         | -15                   |
| 32               | 0                            | -5                      | -5                         | -15                   |
| 33               | 0                            | -5                      | -15                        | -15                   |
| 34               | 0                            | -5                      | -30                        | -15                   |
